# Supplementary material for: Knowledge, attitude and practice of healthcare providers on mistreatment during labour and childbirth: a cross-sectional study in Tehran, Iran, 2021
Source: Research Square preprint supplement (doi:10.21203/rs.3.rs-1806039/v1), 2022-07-22
Supplement: Supplementary file 1 [file 6805d1bfa254b71338a5a784.docx]

1. **Knowledge items**

| **Item** | **Content Validity Index (CVI)** | | | | | **Content Validity Ratio (CVR)** | |
| --- | --- | --- | --- | --- | --- | --- | --- |
| **I-CVI (Relevancy)** | **I-CVI (Clarity)** | **I-CVI (Simplicity)** | **I-CVI** | **S-CVI** | **I-CVR (Necessity)** | **S-CVR** |
| 1 | 0.91 | 0.91 | 0.91 | 0.91 | 0.93 | 0.66 | 0.75 |
| 2 | 0.83 | 0.83 | 0.83 | 0.83 | 0.66 |
| 3 | 0.83 | 1.0 | 1.0 | 0.94 | 0.66 |
| 4 | 0.91 | 1.0 | 0.83 | 0.91 | 0.83 |
| 5 | 0.75 | 1.0 | 0.91 | 0.88 | 0.66 |
| 6 | 1.0 | 1.0 | 0.91 | 0.97 | 0.83 |
| 7 | 1.0 | 0.91 | 0.91 | 0.94 | 0.66 |
| 8 | 1.0 | 1.0 | 1.0 | 1.0 | 1.0 |
| 9 | 0.91 | 1.0 | 1.0 | 0.97 | 0.66 |
| 10 | 0.83 | 1.0 | 1.0 | 0.94 | 0.83 |
| 11 | 1.0 | 1.0 | 1.0 | 1.0 | 0.66 |

1. **Attitude items**

| **Item** | **Content Validity Index (CVI)** | | | | | **Content Validity Ratio (CVR)** | |
| --- | --- | --- | --- | --- | --- | --- | --- |
| **I-CVI (Relevancy)** | **I-CVI (Clarity)** | **I-CVI (Simplicity)** | **I-CVI** | **S-CVI** | **I-CVR (Necessity)** | **S-CVR** |
| 1 | 1.0 | 1.0 | 1.0 | 1.0 | 0.92 | 0.66 | 0.73 |
| 2 | 0.91 | 1.0 | 0.91 | 0.94 | 0.83 |
| 3 | 0.83 | 0.91 | 1.0 | 0.91 | 0.83 |
| 4 | 0.83 | 0.91 | 0.91 | 0.88 | 0.66 |
| 5 | 0.83 | 1.0 | 0.83 | 0.88 | 0.83 |
| 6 | 1.0 | 1.0 | 1.0 | 1.0 | 0.66 |
| 7 | 0.91 | 0.91 | 1.0 | 0.94 | 0.83 |
| 8 | 0.83 | 0.91 | 0.91 | 0.84 | 0.66 |
| 9 | 0.91 | 0.91 | 1.0 | 0.94 | 0.83 |
| 10 | 0.75 | 0.91 | 1.0 | 0.88 | 0.66 |
| 11 | 0.83 | 0.91 | 1.0 | 0.91 | 0.66 |
| 12 | 1.0 | 1.0 | 1.0 | 1.0 | 0.83 |
| 13 | 0.91 | 0.91 | 0.83 | 0.88 | 0.66 |

1. **Practice items**

| **Item** | **Content Validity Index (CVI)** | | | | | **Content Validity Ratio (CVR)** | |
| --- | --- | --- | --- | --- | --- | --- | --- |
| **I-CVI (Relevancy)** | **I-CVI (Clarity)** | **I-CVI (Simplicity)** | **I-CVI** | **S-CVI** | **I-CVR (Necessity)** | **S-CVR** |
| 1 | 1.0 | 1.0 | 1.0 | 1.0 | 0.95 | 1.0 | 0.81 |
| 2 | 1.0 | 1.0 | 1.0 | 1.0 | 1.0 |
| 3 | 1.0 | 1.0 | 1.0 | 1.0 | 0.83 |
| 4 | 0.91 | 0.91 | 0.91 | 0.91 | 0.83 |
| 5 | 0.91 | 0.91 | 0.91 | 0.91 | 0.66 |
| 6 | 1.0 | 0.83 | 0.83 | 0.88 | 0.83 |
| 7 | 1.0 | 1.0 | 0.91 | 0.97 | 1.0 |
| 8 | 1.0 | 1.0 | 0.91 | 0.97 | 0.83 |
| 9 | 1.0 | 1.0 | 0.91 | 0.91 | 0.66 |
| 10 | 0.91 | 0.83 | 0.83 | 0.85 | 0.66 |
| 11 | 1.0 | 1.0 | 1.0 | 1.0 | 1.0 |
| 12 | 0.91 | 1.0 | 1.0 | 0.97 | 0.66 |
| 13 | 1.0 | 1.0 | 1.0 | 1.0 | 0.83 |
| 14 | 0.91 | 1.0 | 1.0 | 0.97 | 0.66 |
