# Supplementary material for: Knowledge, attitude and practice of healthcare providers on mistreatment during labour and childbirth: a cross-sectional study in Tehran, Iran, 2021
Source: Research Square preprint supplement (doi:10.21203/rs.3.rs-1806039/v1), 2022-07-22
Supplement: Supplementary file 2 [file a14175aedc6518f255c05204.docx]

1. **Socio-demographic characteristics**

| **N.** | **Question** | **Possible option** |
| --- | --- | --- |
| 1 | Name of hospital/ institution |  |
| 2 | How old are you? |  |
| 3 | What is your marital status? | A. Single  B. Married  C. Divorced  D. Widowed |
| 4 | What is your profession? | A. Student (Go to Question 6)  B. Midwife (Go to Question 7)  C. Obstetrician (Go to Question 7) |
| 5 | What is your field of study? | A. Midwifery  B. Medical intern  C. First year resident  D. Second year resident  E. Third year resident  F. Fourth year resident |
| 6 | What is your employment status? | A. Permanent  B. Informal  C. Contractual |
| 7 | What best describes your monthly income (IRR)? (Please check one) | A. No income  B. 10,000,000 - 50,000,000  C. 60,000,000 - 100,000,000  D. 110,000,000 - 150,000,000  E. More than 150,000,000 |
| 8 | How many years do you have work experience? |  |
| 9 | How many night shifts do you have per month? |  |
| 10 | Have you ever been trained on respectful maternity care or maternity mistreatment? | A. Yes (Go to Question 11)  B. No |
| 11 | What kind of training was it? |  |

1. **Knowledge items**

*Please read the questions carefully and choose the appropriate option.*

| **N.** | **Item** | **Yes** | **NO** | **Do not know** |
| --- | --- | --- | --- | --- |
| 1 | In your opinion, can putting pressure on women’s abdomen during childbirth (applying fundal pressure) be considered as mistreatment? |  |  |  |
| 2 | In your opinion, is using the phrase “If you do not give birth, you will be taken to the operating room for a cesarean section” a form of mistreatment? |  |  |  |
| 3 | A woman states that she has been waiting in labour for a long time to receive services (in her opinion, for no reason). In your opinion, has there been disrespectful care? |  |  |  |
| 4 | A woman tends to have a squatting position for birth and this permission has not been given to her. In your opinion, has there been disrespectful care? |  |  |  |
| 5 | A woman states that she has been asked for rewards for birth of her baby. In your opinion, has there been disrespectful care? |  |  |  |
| 6 | In Labour, woman does not collaborate, and you force her by saying, “If you do not collaborate and a problem arises for you or your baby, you are responsible for the consequences”. In your opinion, has there been disrespectful care? |  |  |  |
| 7 | Despite her consent, a woman has been examined by maternity healthcare providers for various reasons during labour and delivery. In your opinion, is this a form of mistreatment? |  |  |  |
| 8 | In a labour, vaginal examinations are performed without using curtains or partitions; and in presence of other labouring women. In your opinion, is this a form of mistreatment? |  |  |  |
| 9 | In labour, a woman screams in pain and you invite her to be silent with your finger. In your opinion, has there been disrespectful care? |  |  |  |
| 10 | The pregnant woman is asked not to get out of bed and not walk while in labour ward. In your opinion, is this a form of mistreatment? |  |  |  |

11. The pregnant woman states that she has received fewer services because of her condition (e.g., HIV or addiction). What kind of mistreatment do you think has taken place?

A. Lack of supportive care

B. Neglect and abandonment

C. Discriminatory care

D. Do not know

1. **Attitudes items**

*Please select the number according to your opinion.*

1 = strongly agree, 2 = agree, 3 = uncertain, 4 = disagree, 5 = strongly disagree

| **N.** | **Item** | **1** | **2** | **3** | **4** | **5** |
| --- | --- | --- | --- | --- | --- | --- |
| 1 | Sometimes physical contact (slapping the thighs) can be used to encourage pregnant women to collaborate. |  |  |  |  |  |
| 2 | Sometimes it is necessary for healthcare providers to force a labouring woman to collaborate with a subtle threat. |  |  |  |  |  |
| 3 | It is not always possible to provide equal services for all women during labour and delivery. |  |  |  |  |  |
| 4 | During birth, husband or companion of a pregnant woman should not be present in delivery room. |  |  |  |  |  |
| 5 | Each vaginal examination should be explained to woman and her consent should be sought. |  |  |  |  |  |
| 6 | If necessary, physical contact (such as fundal pressure) can sometimes be used to speed up the delivery process. |  |  |  |  |  |
| 7 | Sometimes shouting at pregnant woman can calm her down and get her to collaborate better. |  |  |  |  |  |
| 8 | Sometimes, when the number of labouring women is high, it is alright to be less present at their bedside. |  |  |  |  |  |
| 9 | Sometimes it is not necessary to explain all the information to women who have a lower level of education and may not realize them or be confused. |  |  |  |  |  |
| 10 | The labouring woman should not be allowed to consume food or fluids in labour. |  |  |  |  |  |
| 11 | It is not always necessary to inform accompany of women about the progress of labour and delivery. |  |  |  |  |  |
| 12 | It is alright, if it is not possible to create privacy for women to be examined in the labour room |  |  |  |  |  |
| 13 | There is not enough staff in hospital to provide quality care to pregnant women. Therefore, it is normal to reduce the quality of services provided. |  |  |  |  |  |

1. **practices items**

*Please select the number according to your opinion.*

1 = always, 2 = often, 3 = sometimes, 4 = rarely, 5 = never

| **N.** | **Item** | **1** | **2** | **3** | **4** | **5** |
| --- | --- | --- | --- | --- | --- | --- |
| 1 | I welcome labouring woman warmly. |  |  |  |  |  |
| 2 | I introduce myself to labouring woman. |  |  |  |  |  |
| 3 | I show labouring woman around the labour unit. |  |  |  |  |  |
| 4 | I establish friendly and appropriate relationship with labouring woman. |  |  |  |  |  |
| 5 | I provide a comfortable environment for labouring woman. |  |  |  |  |  |
| 6 | I keep medical records and the results of examinations and consultations confidential. |  |  |  |  |  |
| 7 | I respect beliefs and culture of laboring woman and her companions. |  |  |  |  |  |
| 8 | I talk to labouring woman about the pain and how to relieve it. |  |  |  |  |  |
| 9 | I encourage labouring woman to call me if needed. |  |  |  |  |  |
| 10 | I pay attention to laboring woman’s safety in providing care and interventions. |  |  |  |  |  |
| 11 | I cover laboring woman’s body during examinations, using sheets. |  |  |  |  |  |
| 12 | I may slap laboring woman’s thighs to encourage her to collaborate during birth. |  |  |  |  |  |
| 13 | I may be harsh with her, if woman does not collaborate. |  |  |  |  |  |
| 14 | I may put pressure on woman’s abdomen (apply fundal pressure) to speed up the birth process. |  |  |  |  |  |
